# Supplementary material for: A rational guide to improve the activity of a hydrogen-evolving polymeric carbon nitride photocatalyst
Source: Royal Society of Chemistry journal article supplement (doi:10.1039/d3se00996c), 2023-11-21
Supplement: d3se00996c1.pdf [file d3se00996c1.pdf]

*Electronic Supplementary Information (ESI)*

# A rational guide to improve the activity of a hydrogen-evolving polymeric carbon nitride photocatalyst

*Kazuhiko Maeda,<sup>\*a,b</sup> Tomoharu Maeda,<sup>a,#</sup> Chomponoot Suppasso,<sup>a,#</sup> Shunta Nishioka,<sup>a</sup> Yoshinobu  
Kamakura,<sup>a</sup> Shuhei Yasuda,<sup>c,§</sup> and Toshiyuki Yokoi<sup>c</sup>*

<sup>a</sup> Department of Chemistry, School of Science, Tokyo Institute of Technology, 2-12-1-NE-2  
Ookayama, Meguro-ku, Tokyo 152-8550, Japan.

<sup>b</sup> Living Systems Materialogy (LiSM) Research Group, International Research Frontiers Initiative  
(IRFI), Tokyo Institute of Technology, 4259 Nagatsuta-cho, Midori-ku, Yokohama, Kanagawa  
226-8502, Japan.

<sup>c</sup> Nanospace Catalysis Unit, Institute of Innovative Research, Tokyo Institute of Technology, 4259  
Nagatsuta-cho, Midori-ku, Yokohama 226-8503, Japan.

<sup>#</sup> Equal contribution

<sup>§</sup> Present address: Department of Applied Chemistry, Faculty of Engineering, University of Toyama,  
3190 Gofuku, Toyama 930-8555, Japan.

\*To whom corresponding author should be addressed.

[maedak@chem.titech.ac.jp](mailto:maedak@chem.titech.ac.jp)

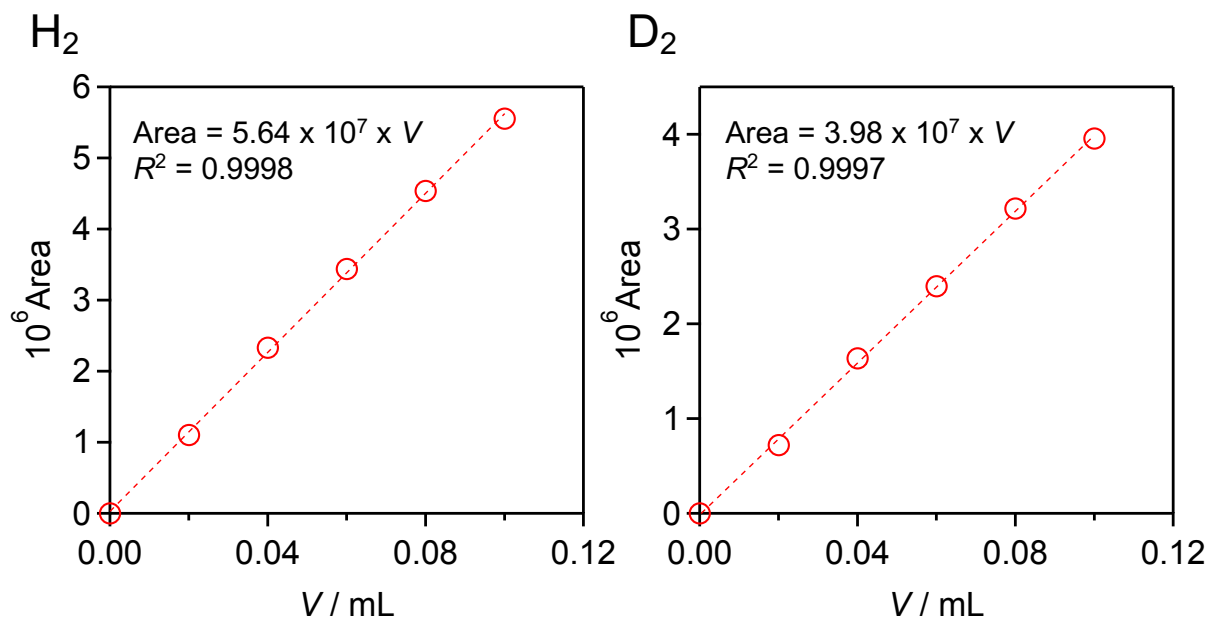

Fig. S1. Typical calibration curves for H<sub>2</sub> and D<sub>2</sub>.

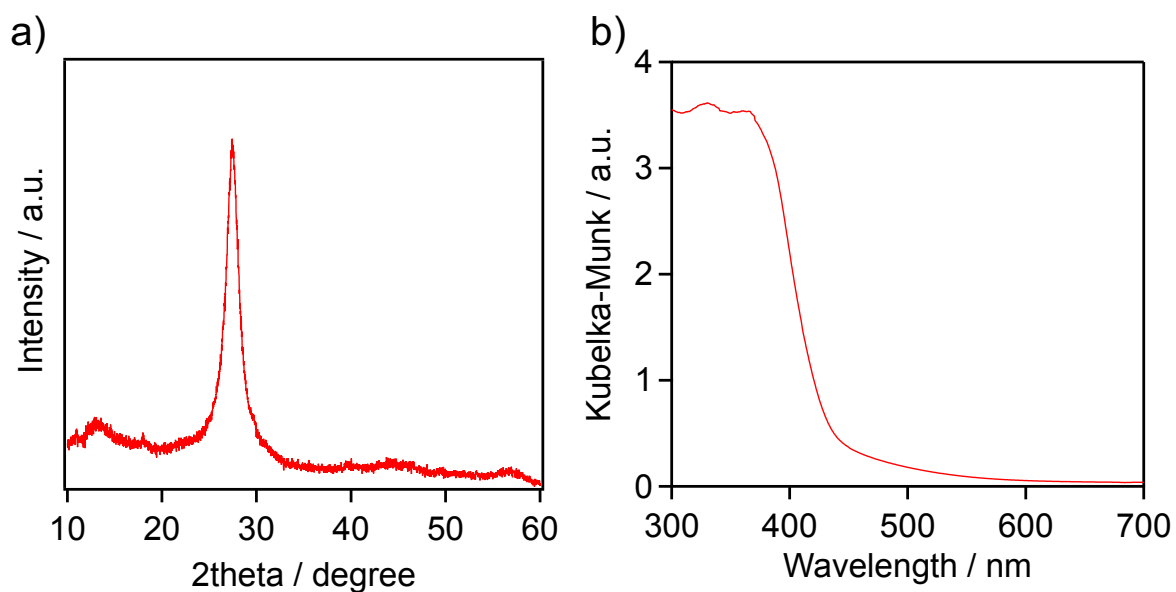

Fig. S2. a) XRD pattern and b) UV-visible diffuse-reflectance spectrum of the as-prepared meso-PCN.

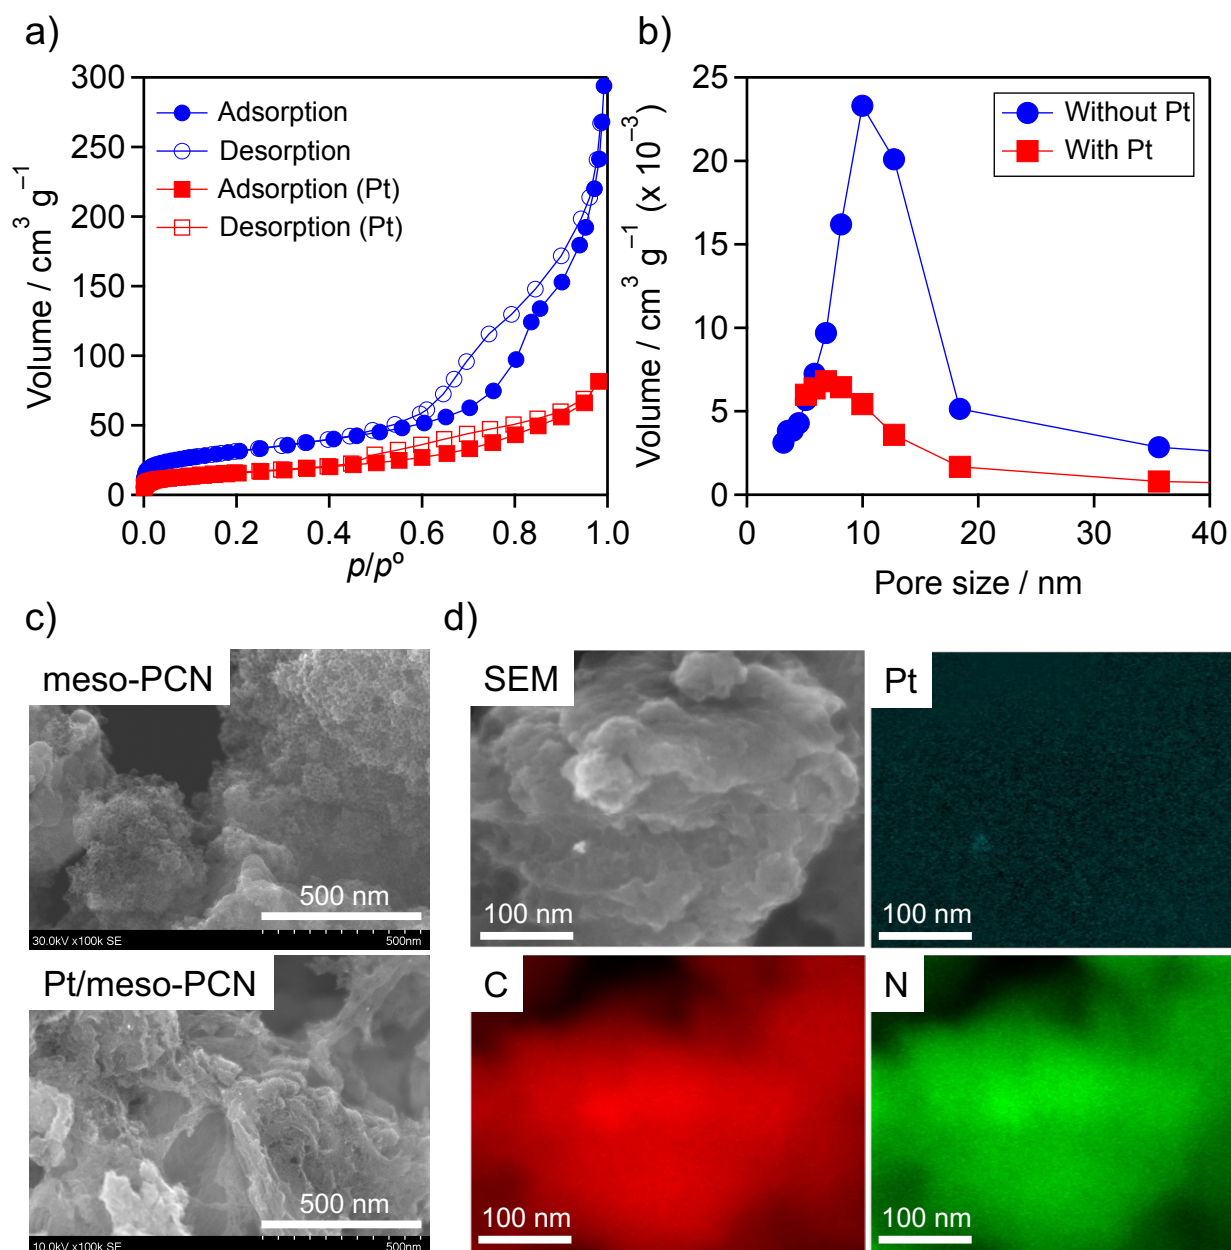

**Fig. S3.** Structural characterization of meso-PCN and Pt/meso-PCN. a) Nitrogen adsorption/desorption isotherms, b) pore-size distribution curves, c) SEM images and d) EDS mapping images.

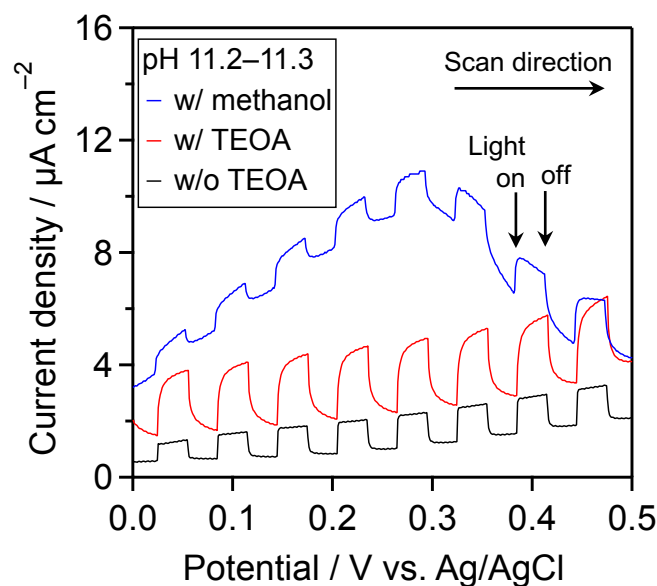

**Fig. S4.** Current–voltage curves for Pt/meso-PCN/FTO electrodes under an Ar atmosphere and under irradiation with chopped visible light ( $\lambda > 400$  nm), as recorded in aqueous  $\text{Na}_2\text{SO}_4$  (0.1 M) containing different additives of TEOA and methanol at pH  $\sim 11$ . Scan rate:  $10 \text{ mV s}^{-1}$ . Note: w/ and w/o in the figure indicate with and without, respectively.

**Table S1.** Results of data analysis for the relationship between the rate of  $\text{H}_2$  evolution under 400 nm monochromatized light ( $v_{\text{H}_2}$ ) and the incident-light intensity ( $I$ )<sup>a</sup>

| Region / $\text{mW cm}^{-2}$ | $a$ | $b$  | $R^2$ |
|------------------------------|-----|------|-------|
| 0.1–1                        | 1.9 | 1.0  | 0.99  |
| 0.1–2                        | 1.7 | 0.93 | 0.99  |
| 0.1–4                        | 1.7 | 0.90 | 0.99  |
| 0.4–12.5                     | 1.8 | 0.69 | 0.97  |
| 1–12.5                       | 1.9 | 0.63 | 0.97  |
| 2–12.5                       | 2.2 | 0.55 | 0.98  |

<sup>a</sup> Reaction conditions: the same shown in Fig. 1 caption. The relationship between  $v_{\text{H}_2}$  and  $I$  is analyzed based on an equation of  $v_{\text{H}_2} = aI^b$ .
